# Supplementary material for: Microinjection to deliver protein, mRNA, and DNA into zygotes of the cnidarian endosymbiosis model Aiptasia sp
Source: PubMed Central journal article supplement (PMC6219564; doi:10.1038/s41598-018-34773-1), 2018-11-06
Supplement: 41598_2018_34773_MOESM3_ESM.pdf [file 41598_2018_34773_MOESM3_ESM.pdf]

Jones et al.  
Supplementary Information

## **Supplementary Information**

**Microinjection to deliver protein, mRNA, and DNA into zygotes of the cnidarian endosymbiosis model *Aiptasia* sp.**

Victor A. S. Jones, Madeline Bucher, Elizabeth A. Hambleton, Annika Guse

**Figure S1**

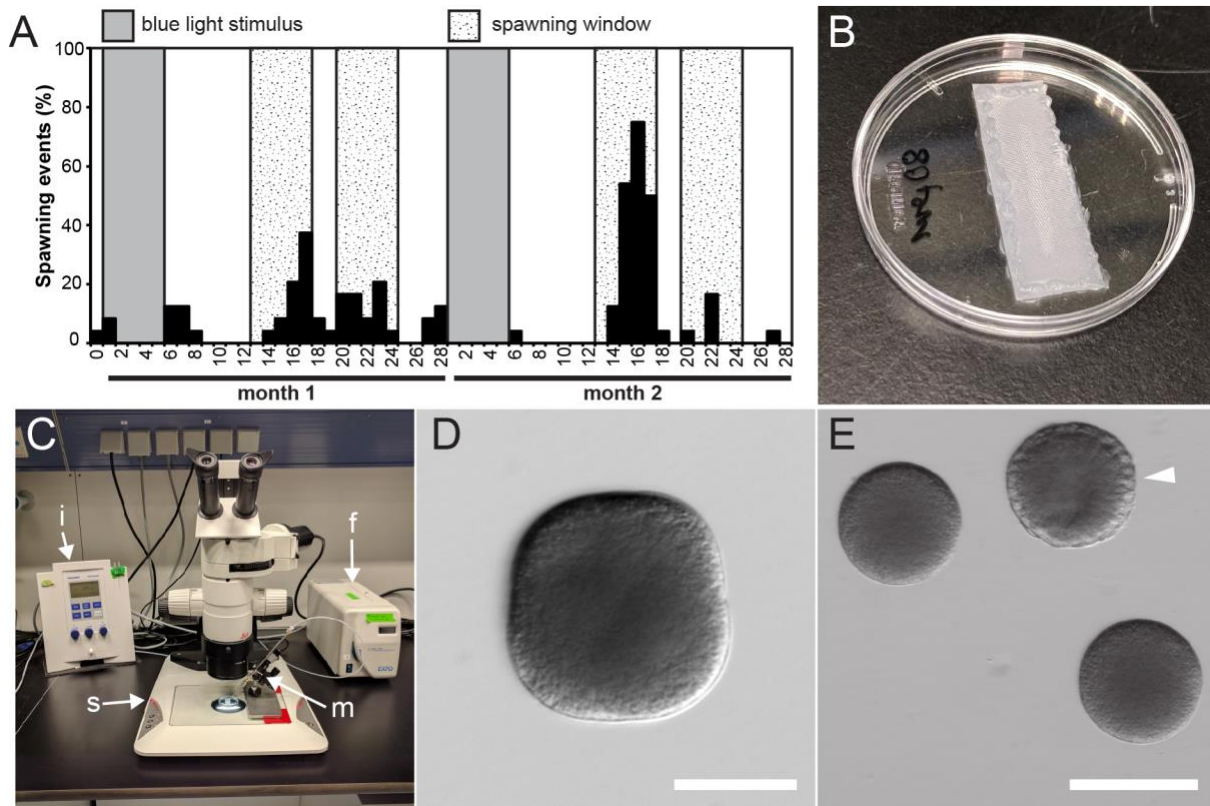

**(A)** Spawning induction efficiency is demonstrated by the percentage of female tanks containing spawned eggs on each day of two consecutive artificial lunar cycles. Duration of the blue-light stimulus (spawning induction cue) is indicated in grey; the expected spawning period is indicated with a speckled background (total of 24 tanks). **(B)** Microinjection dishes are prepared by affixing a strip of 80 x 80  $\mu\text{m}$  nylon mesh on the bottom of a small petri dish lid using silicon grease around the edges. **(C)** Microinjection set-up with stereomicroscope (s), fluorescence lamp (f), micromanipulator (m), injection pedal (not shown), and FemtoJet 4i injector (i). **(D)** The injection session proceeds until most zygotes assume a box-like shape, indicating imminent cleavage to 4-cell stage. Scale = 100  $\mu\text{m}$ . **(E)** Developing embryos (arrowhead) and unfertilized eggs can be clearly differentiated 4-5 h post-fertilization (hpf). Scale = 50  $\mu\text{m}$ .

**Figure S2**

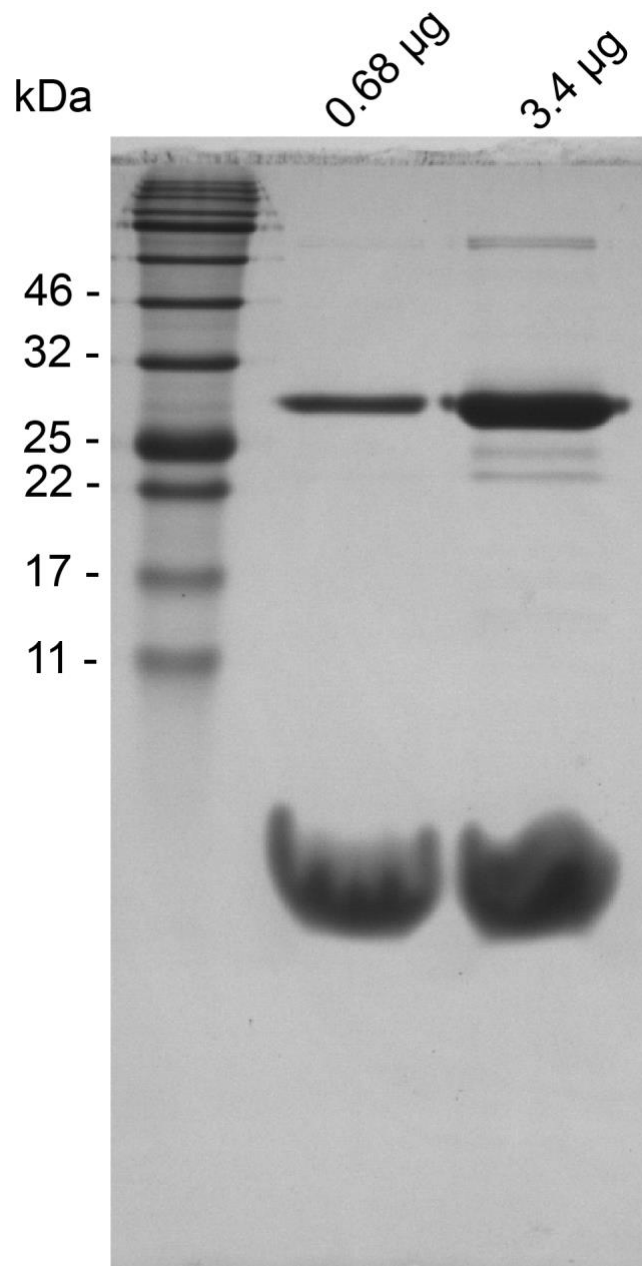

Recombinant Lifect-eGFP protein (30.6 kDa) resolved with SDS-PAGE and stained with Coomassie Brilliant Blue to visualize. Protein was injected at 3.4 mg/ml into zygotes. Left lane, ladder.

### Figure S3

A

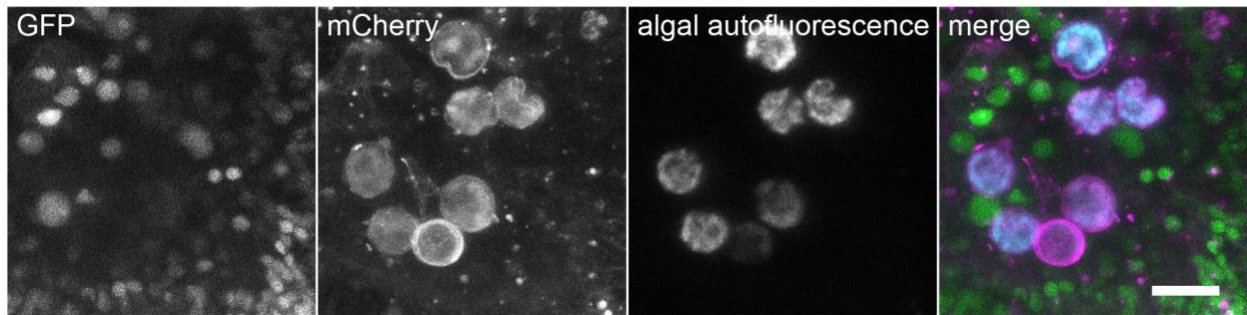

B

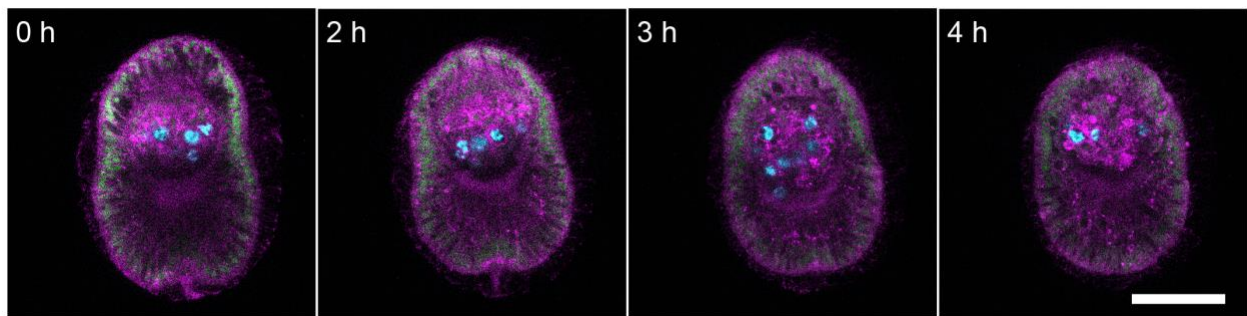

(A) Within a single *Aiptasia* larva, the strength of symbiosome labeling by farnesylated mCherry (magenta) and algal far-red autofluorescence (cyan) are variable. Larva was injected with *NLS-eGFP-2A-mCherry-CaaX* mRNA and incubated for 2 days with *Symbiodinium* strain SSB01 at 10,000 cells/ml, before fixation at 4 dpf. Scale = 10  $\mu$ m. (B) Agarose-embedded larvae can be imaged live for several hours. Larva was injected with *NLS-eGFP-2A-mCherry-CaaX* mRNA and incubated for 1 day with *Symbiodinium* strain SSB01 at 10,000 cells/ml, then at 3 dpf embedded in low-melt agarose and imaged at the shown times. Z-stacks were taken with confocal laser-scanning microscopy once every 30 min. Scale = 50  $\mu$ m.

#### Movie S1

Live imaging of larvae after incubation with *Symbiodinium* strain SSB01 at 100,000 cells/ml for 2 days. Larva was embedded in low-melt agarose and imaged at 4 dpf with DIC and fluorescence microscopy to monitor intracellular symbionts via their natural autofluorescence using a TexasRed filter set. False color representation with 5 ramps LUT. Scale = 100  $\mu$ m.

#### Movie S2

Live imaging of the endoderm of a larva injected with *NLS-eGFP-2A-mCherry-CaaX* mRNA and incubated for 1 day with *Symbiodinium* strain SSB01 at 100,000 cells/ml. Larva was embedded in low-melt agarose and imaged at 3 dpf with confocal laser-scanning microscopy, at a rate of one frame per 2.5 sec. mCherry channel left, grayscale; merge of mCherry (magenta), eGFP (green) and algal red autofluorescence (cyan), right. Scale = 10  $\mu$ m.

### Supplementary Table S1

| Actin gene accession # | Primer direction | Primer sequence 5' – 3'        | Amplicon (promoter) length, bp |
|------------------------|------------------|--------------------------------|--------------------------------|
| <i>XM_021049442.1</i>  | Forward          | CCTCTGGCAACGTAACACCAAC         | 1479                           |
| <i>XM_021049442.1</i>  | Reverse          | TTTGTGAGTAGTTTTGAATTGAGA       | 1479                           |
| <i>XM_021045858.1</i>  | Forward          | GGCATCCGTCTCGTCACGATAG         | 1504                           |
| <i>XM_021045858.1</i>  | Reverse          | TTTAATATATTTTAGAAAGGTCAAACACC  | 1504                           |
| <i>XM_021060755.1</i>  | Forward          | CTGACATCAGCCGTACTCTAGAAC       | 1463                           |
| <i>XM_021060755.1</i>  | Reverse          | TGTAAGTTTGAAGTATGAAGTGAA       | 1463                           |
| <i>KXJ15097.1</i>      | Forward          | TATATTGACGATCCAAGTGTCACA       | 998                            |
| <i>KXJ15097.1</i>      | Reverse          | GTTGGTTYTAAAATTTACTTACAACGAACA | 998                            |
